# Supplementary material for: Low-Carbohydrate Tolerant LAB Strains Identified from Rumen Fluid: Investigation of Probiotic Activity and Legume Silage Fermentation
Source: PubMed Central journal article supplement (PMC7409070; doi:10.3390/microorganisms8071044), 2020-07-14
Supplement: microorganisms-08-01044-s001.pdf [file microorganisms-08-01044-s001.pdf]

# Low-Carbohydrate Tolerant LAB Strains Identified from Rumen Fluid: Investigation of Probiotic Activity and Legume Silage Fermentation

Palaniselvam Kuppusamy <sup>1†</sup>, Dahye Kim <sup>2†</sup>, Soundharrajan Ilavenil <sup>1</sup>, Hyung Soo Park <sup>1</sup>, Jeong Sung Jung <sup>1</sup>, Seung Hak Yang <sup>1</sup> and Ki Choon Choi <sup>1,\*</sup>

<sup>1</sup> Grassland and Forages Division, National Institute of Animal Science, Rural Development Administration, Cheonan 31000, Republic of Korea; kpalaselvam@korea.kr (P.K.); ilavenil@korea.kr (S.I.); anpark69@korea.kr (H.S.P.); jjs3873@korea.kr (J.S.J.); y64h@korea.kr (S.H.Y.)

<sup>2</sup> Faculty of Biotechnology, College of Applied Life Science, Jeju National University, Jeju, 63243, Republic of Korea; pioioiq10@gmail.com

\* Correspondence: choiwh@korea.kr; Tel.: +82-41-580-6752; Fax: +82-(041)-580-6779

† These authors contributed equally to this work.

**Table S1.** Carbohydrate-fermentation of RJ1 and S22 using API 50 CHL test kit.

| S. No | Carbohydrates            | RJ1 | S22 |
|-------|--------------------------|-----|-----|
| 1     | Control                  | -   | -   |
| 2     | Glycerol                 | -   | -   |
| 3     | Erythritol               | -   | -   |
| 4     | D-Arabinose              | -   | -   |
| 5     | L.Arabinose              | +   | +   |
| 6     | D-Ribose                 | +   | +   |
| 7     | D-Xylose                 | -   | -   |
| 8     | L-Xylose                 | -   | -   |
| 9     | D-Adonitol               | -   | -   |
| 10    | Methyl-D-Xylopyraniside  | -   | -   |
| 11    | D-Galactose              | +   | +   |
| 12    | D-Glucose                | +   | +   |
| 13    | D-Fructose               | +   | +   |
| 14    | D-Mannose                | +   | +   |
| 15    | L-Sorbose                | +   | -   |
| 16    | L-Rhamnose               | +   | -   |
| 17    | Dulcitol                 | -   | -   |
| 18    | Inositol                 | -   | -   |
| 19    | D-Mannitol               | +   | +   |
| 20    | D-Sorbitol               | +   | -   |
| 21    | Methyl-D-mannopyranoside | +   | +   |
| 22    | Methyl-D-glucopyranoside | +   | -   |
| 23    | N-Acetylglucosamine      | +   | +   |
| 24    | Amygdalin                | +   | +   |
| 25    | Arbutin                  | +   | +   |
| 26    | Esculin ferric citrate   | +   | +   |
| 27    | Salicin                  | +   | +   |
| 28    | D-Celiobiose             | +   | +   |
| 29    | D-Maltose                | +   | +   |
| 30    | D-Lactose                | +   | +   |
| 31    | D-Melibiose              | +   | +   |
| 32    | D-Saccharose             | +   | +   |
| 33    | D-Trehalose              | +   | -   |
| 34    | Inulin                   | -   | -   |
| 35    | D-Melezitose             | +   | +   |
| 36    | D-Raffinose              | -   | -   |
| 37    | Amidon                   | -   | -   |
| 38    | Glycogen                 | -   | -   |
| 39    | Xylitol                  | -   | -   |
| 40    | Gentiobiose              | +   | -   |
| 41    | D-Turanose               | +   | -   |
| 42    | D-Lyxose                 | -   | -   |
| 43    | D-Tagatose               | -   | -   |
| 44    | D-Fucose                 | -   | -   |
| 45    | L-Fucose                 | -   | -   |
| 46    | D-Arabitol               | -   | -   |

|    |                                     |   |   |
|----|-------------------------------------|---|---|
| 47 | L-Arabitol                          | - | - |
| 48 | Potassium gluconate                 | + | + |
| 49 | Potassium gluconate 2-ketogluconate | - | - |
| 50 | Potassium gluconate 5-ketogluconate | - | - |

+ -presence; -absence.

**Table S2.** Qualitative analysis of enzyme production of RJ1 and S22 using API-ZYM test kit.

| S. No | Extra Cellular Enzymes             | RJ1 | S22 |
|-------|------------------------------------|-----|-----|
| 1     | Control                            | -   | -   |
| 2     | Alkaline phosphatase               | +   | +   |
| 3     | Esterase (C4)                      | ++  | ++  |
| 4     | Esterase lipase (C8)               | +++ | ++  |
| 5     | Lipase (C14)                       | ++  | +++ |
| 6     | Leucine arylamidase                | ++  | +++ |
| 7     | Valine arylamidase                 | ++  | +++ |
| 8     | Cystine arylamidase                | ++  | ++  |
| 9     | Trypsin                            | ++  | +   |
| 10    | $\alpha$ -Chymotrypsin             | +++ | ++  |
| 11    | Acid phosphatase                   | +++ | ++  |
| 12    | Naphthol-AS-biphosphohydrolase     | +++ | ++  |
| 13    | $\alpha$ -Galactosidase            | +++ | +++ |
| 14    | $\beta$ -Galactosidase             | +++ | +++ |
| 15    | $\beta$ -Glucuronidase             | +++ | +++ |
| 16    | $\alpha$ -Glucosidase              | +++ | ++  |
| 17    | $\beta$ -Glucosidase               | +++ | +++ |
| 18    | N-acetyl- $\beta$ -glucosaminidase | ++  | ++  |
| 19    | $\alpha$ -Mannosidase              | -   | +   |
| 20    | $\alpha$ -Fucosidase               | +   | +   |

+++-high; ++- moderate; - no activity.

**Table S3.** Antibiotic resistance profile of *L. plantarum* RJ1 and *P. pentosaceus* S22 analyzed by the disc-diffusion method (S-susceptible; R-resistant; M-moderate).

| S. No | Antibiotics               | Disc Potency (mcg) | RJ1 | S22 |
|-------|---------------------------|--------------------|-----|-----|
| 1     | Lomefloxacin (LOM)        | 10                 | R   | S   |
| 2     | Norfloxacin (NX)          | 10                 | M   | M   |
| 3     | Azithromycin (AZM)        | 15                 | S   | S   |
| 4     | Vancomycin (VA)           | 30                 | R   | R   |
| 5     | Doxycycline hydrochloride |                    | S   | S   |
| 6     | Co-Trimoxazole (COT)      | 25                 | S   | S   |
| 7     | Nitrofurantoin (NIT)      | 300                | S   | S   |
| 8     | Gatifloxacin (GAT)        | 5                  | S   | S   |
| 9     | Carbenicillin (CB)        | 100                | S   | M   |
| 10    | Cefoxitin (CX)            | 30                 | M   | M   |
| 11    | Clindamycin (CD)          | 2                  | M   | S   |
| 12    | Chloramphenicol (C)       | 30                 | S   | S   |
| 13    | Erythromycin (E)          | 15                 | S   | M   |
| 14    | Metronidazole (MT)        | 5                  | R   | R   |
| 15    | Penicillin (P)            | 10                 | M   | R   |
| 16    | Tetracycline (TE)         | 30                 | S   | S   |

|    |                  |     |   |   |
|----|------------------|-----|---|---|
| 17 | Bacitracin (B)   | 10  | M | M |
| 18 | Polymyxin-B (PB) | 300 | M | R |
| 19 | Gentamycin (GEN) | 10  | S | M |
| 20 | Neomycin (N)     | 30  | S | S |

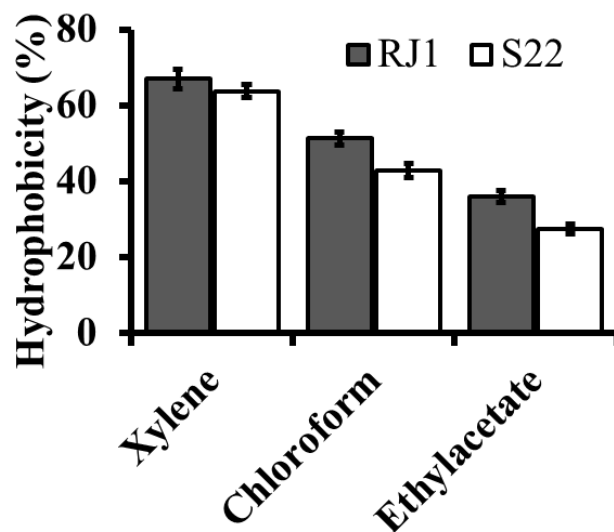

**Figure S1.** Assessment of cell-surface hydrophobicity of *L. plantarum* RJ1 and *P. pentosaceus* S22.

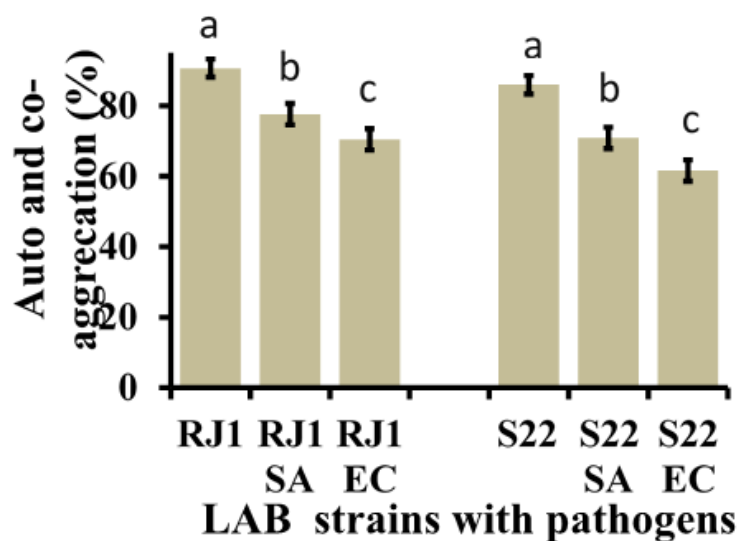

**Figure S2.** The auto and co-aggregation abilities of RJ1 and S22 (SA-*Staphylococcus aureus*; EC-*E.coli* pathogens).
